# Supplementary material for: Synthesis and characterization of all-inorganic (CsPbBr3) perovskite single crystals
Source: Royal Society of Chemistry journal article supplement (doi:10.1039/d2ma00345g), 2022-01-01
Supplement: d2ma00345g1.pdf [file d2ma00345g1.pdf]

## Supplementary Information

# Synthesis and Characterization of All Inorganic (CsPbBr<sub>3</sub>) Perovskite Single Crystal

Ramashanker Gupta<sup>1,2,4</sup>, Ram Datt<sup>1,3</sup>, Swapnil Barthwal<sup>4</sup>, Harshit Sharma<sup>1,2</sup>, Animesh Pandey<sup>1,2</sup>, Ridip Deka<sup>1</sup>, Pranjit Sarkar<sup>1</sup>, Sudhir Husale<sup>1,2</sup>, Ritu Srivastava<sup>\*1,2</sup>, Vinay Gupta<sup>\*6</sup>, Sandeep Arya<sup>5</sup>, and Sandeep Pathak<sup>\*4</sup>

<sup>1</sup>Advanced Materials and Device Metrology, CSIR-National Physical Laboratory, Dr. K. S. Krishnan Marg, New Delhi, 110012, India

<sup>2</sup>Academy of Scientific and Innovative Research (AcSIR), Ghaziabad, 201002, India

<sup>3</sup>SPECIFIC, Faculty of Science and Engineering, Swansea University, Bay Campus, Fabian Way, Swansea, SA1 8EN, United Kingdom

<sup>4</sup>Department of Energy Science and Engineering, Indian Institute of Technology Delhi, 110016 New Delhi, India

<sup>5</sup>Department of Physics, University of Jammu, Jammu, Jammu and Kashmir, 180006, India

<sup>6</sup>Department of Physics, Khalifa University, Abu Dhabi, 127788, United Arab Emirates

\*Corresponding author email id: [drvinaygupta@netscape.net](mailto:drvinaygupta@netscape.net); [ritu@nplindia.org](mailto:ritu@nplindia.org)  
[sandeepathak04@gmail.com](mailto:sandeepathak04@gmail.com)

### S1. Photoconductivity measurements using two probes:

To study the photoconductivity measurement, a photon is irradiated on a single crystal sample, where two probes instrument is used to read through the photosensitive properties. During Photoconductivity analysis, a single crystal sample with the contact of silver (Ag) paste leads to the number of photons illuminated from the sample, which turns into photocurrent. Time-dependent photoresponse was examined with the two monochromatic stable laser wavelengths 532nm and 376nm (UV and visible range) at room temperature.

The cascade Keithley 2634B source meter, along with an instrument from Microtech accomplices, is attached to illumination monochromatic laser sources of UV-376 nm with power ( $P_d=2.8\text{mW}/\text{cm}^2$ ) and Visible range -532 nm ( $P_d=32\text{ mW}/\text{cm}^2$ ), which complete the optoelectrical analysis of the single crystal. The Detectivity and responsivity are anticipated using the relation, the number of photocurrents generated by photons per unit irradiation area, and the illumination of the light sources power. <sup>1,2</sup>

$$R_{ph} = \frac{I_{ph}}{P_d A}$$

$R_{ph}$ ,  $A$ ,  $P_d$  represents responsivity, illumination area, incident power, respectively.

Detectivity is a relation between the noise-equivalent power (NEP) and responsivity:<sup>3,4</sup>

$$D = \frac{R_{ph} \sqrt{A}}{\sqrt{2qI_{dark}}} =$$

$I_{dark}$ ,  $R_{ph}$ ,  $q$  and  $A$  represents a dark current, photoresponsivity, elementary charge, and illumination area respectively.

The measurements of rise and fall times were obtained by the help of fitting curves with equation I and II respectively,

$$I = I_0 \left( 1 - e^{-\frac{t}{\tau_r}} \right) \tag{I}$$

$$I = I_0 \left( e^{-\frac{t}{\tau_d}} \right) \tag{II}$$

Where  $\tau_r$  and  $\tau_d$  listed the rise and the decay time constants respectively, The results were observed in millisecond time scale for UV and Visible light irradiation.

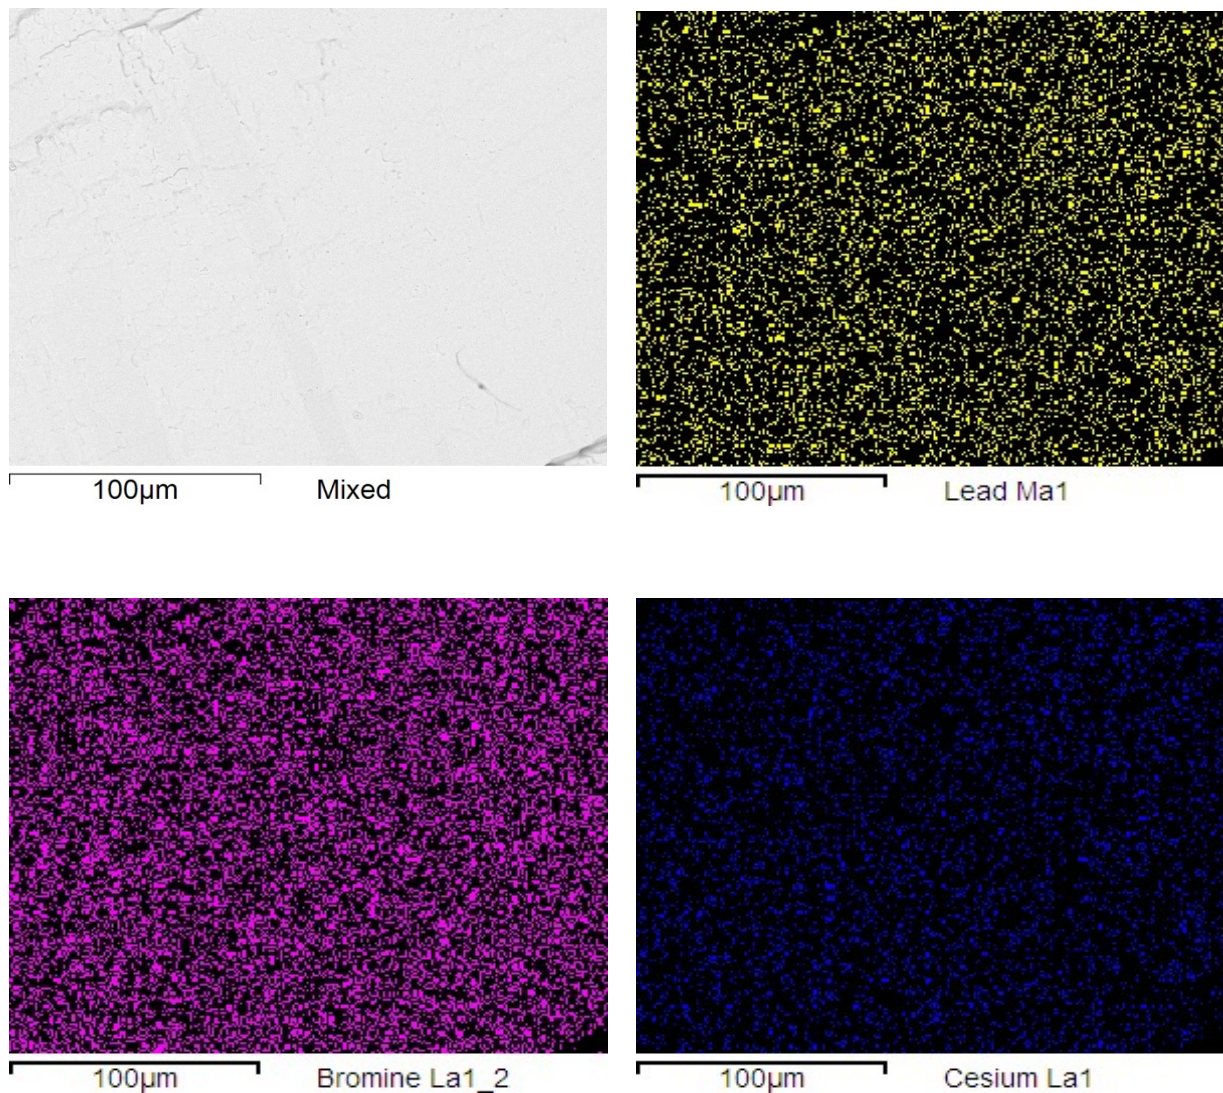

### Summary results

| Element | Weight % | Weight % $\sigma$ | Atomic % |
|---------|----------|-------------------|----------|
| Bromine | 41.507   | 0.528             | 59.596   |
| Cesium  | 25.885   | 0.519             | 22.346   |
| Lead    | 32.608   | 0.612             | 18.058   |

*Figure S1: Represent elementary analysis by energy-dispersive X-ray spectroscopy in Supplementary Figure S1*

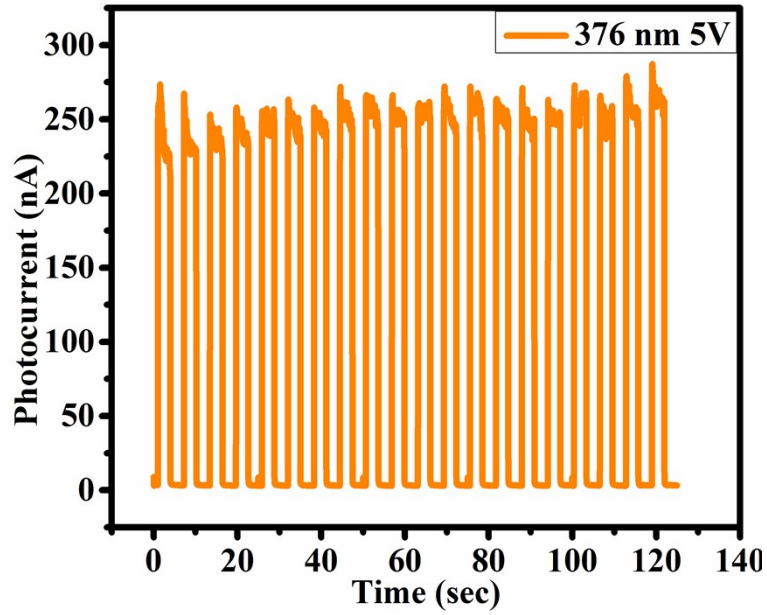

*Figure S2: Represent long photocurrent response.*

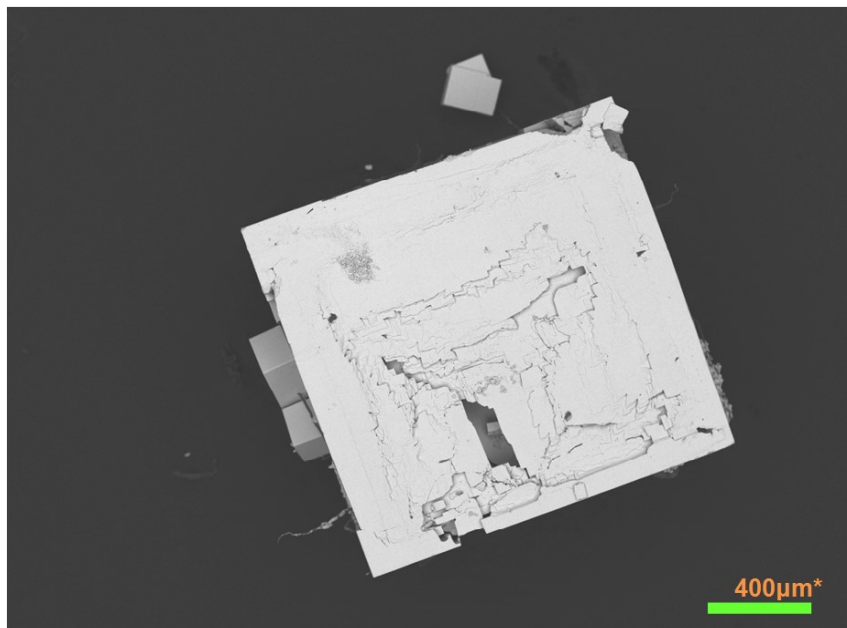

*Figure S3: SEM image CsPbBr<sub>3</sub> perovskite single crystal.*

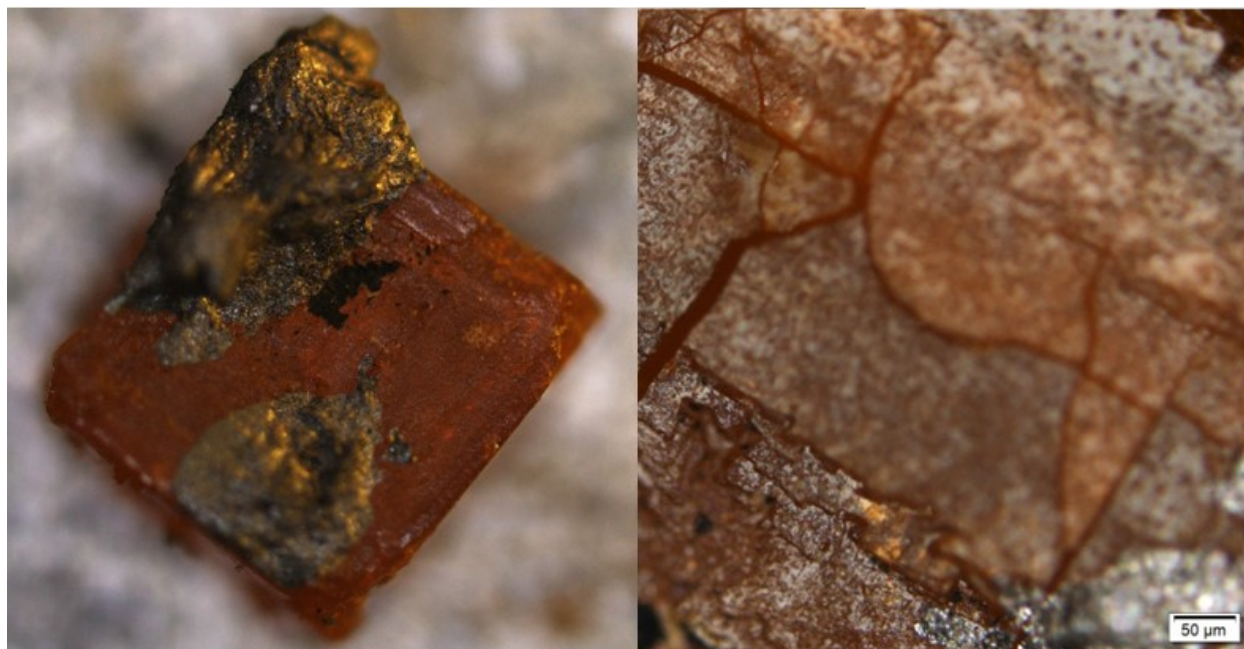

**Figure S4:** image  $\text{CsPbBr}_3$  perovskite single crystal under optical microscopy.

**References:**

- 1 P.-H. Chang, S.-Y. Liu, Y.-B. Lan, Y.-C. Tsai, X.-Q. You, C.-S. Li, K.-Y. Huang, A.-S. Chou, T.-C. Cheng, J.-K. Wang and C.-I. Wu, *Sci. Rep.*, 2017, **7**, 46281.
- 2 W. Feng, J.-B. Wu, X. Li, W. Zheng, X. Zhou, K. Xiao, W. Cao, B. Yang, J.-C. Idrobo, L. Basile, W. Tian, P. Tan and P. Hu, *J. Mater. Chem. C*, 2015, **3**, 7022–7028.
- 3 X. Luo, F. Zhao, L. Du, W. Lv, K. Xu, Y. Peng, Y. Wang and F. Lu, *npj Flex. Electron.*, 2017, **1**, 6.
- 4 C. H. Ji, K. T. Kim and S. Y. Oh, *RSC Adv.*, 2018, **8**, 8302–8309.
